# Supplementary material for: Use of Telehealth During the COVID-19 Pandemic: Scoping Review
Source: PubMed Central journal article supplement (PMC7710390; doi:10.2196/24087), 2020-12-01
Supplement: jmir_v22i12e24087_app4.pdf [file jmir_v22i12e24087_app4.pdf]

## Multimedia appendix 4

**Table S1**  
**World Health Organization Classification**

|                       |                      |
|-----------------------|----------------------|
| Africa                | Number (Frequency %) |
| N/A                   | N/A                  |
| <b>Total</b>          | <b>0 (0)</b>         |
| South East Asia       | Number (Frequency %) |
| India                 | 25 (4.6)             |
| Bangladesh            | 1 (0.2)              |
| N/A                   | N/A                  |
| <b>Total</b>          | <b>26</b>            |
| Eastern Mediterranean | Number (Frequency %) |
| Iran                  | 8 (1.5)              |
| Pakistan              | 4 (0.7)              |
| Lebanon               | 2 (0.4)              |
| Afghanistan           | 1 (0.2)              |
| Jordan                | 1 (0.2)              |
| UAE                   | 1 (0.2)              |
| Saudi Arabia          | 1 (0.2)              |
| <b>Total</b>          | <b>18 (3.4)</b>      |
| Americas              | Number (Frequency %) |
| USA                   | 237 (43.6)           |
| Canada                | 25 (4.6)             |
| Brazil                | 10 (1.8)             |
| Mexico                | 3 (0.6)              |
| Chile                 | 1 (0.2)              |
| Argentina             | 1 (0.2)              |
| <b>Total</b>          | <b>277 (51)</b>      |
| Europe                | Number (Frequency %) |
| UK                    | 52                   |
| Italy                 | 44                   |
| France                | 15                   |
| Spain                 | 13                   |
| Switzerland           | 7                    |
| Germany               | 6                    |
| Ireland               | 5                    |
| Greece                | 4                    |

|              |            |
|--------------|------------|
| Denmark      | 4          |
| Netherlands  | 3          |
| Austria      | 2          |
| Norway       | 2          |
| Poland       | 2          |
| Sweden       | 2          |
| Turkey       | 2          |
| Belgium      | 1          |
| Croatia      | 1          |
| Hungary      | 1          |
| Luxembourg   | 1          |
| Portugal     | 1          |
| <b>Total</b> | <b>168</b> |

| Western Pacific | Number (Frequency %) |
|-----------------|----------------------|
| Australia       | 16 (2.9)             |
| China           | 15 (2.8)             |
| Singapore       | 11 (2)               |
| Japan           | 5 (0.9)              |
| South Korea     | 4 (0.7)              |
| New Zealand     | 2 (0.4)              |
| Taiwan          | 1 (0.2)              |
| <b>Total</b>    | <b>54 (9.9)</b>      |

## Table S2 World Bank Classification

|                               |                      |
|-------------------------------|----------------------|
| Low income countries          | Number (Frequency %) |
| Afghanistan                   | 1 (0.2)              |
| N/A                           | N/A                  |
| <b>Total</b>                  | <b>1 (0.2)</b>       |
| Lower-middle income countries | Number (Frequency %) |
| India                         | 25 (4.6)             |
| Pakistan                      | 4 (0.7)              |
| Bangladesh                    | 1 (0.2)              |
| <b>Total</b>                  | <b>30 (5.5)</b>      |
| Upper-middle income countries | Number (Frequency %) |
| China                         | 15 (2.8)             |
| Brazil                        | 10 (1.8)             |
| Iran                          | 8 (1.5)              |
| Mexico                        | 3 (0.6)              |
| Lebanon                       | 2 (0.4)              |
| Turkey                        | 2 (0.4)              |
| Argentina                     | 1 (0.2)              |
| Jordan                        | 1 (0.2)              |
| <b>Total</b>                  | <b>42 (7.9)</b>      |
| High income countries         | Number (Frequency %) |
| USA                           | 237 (43.6)           |
| UK                            | 52 (9.5)             |
| Italy                         | 44 (8.1)             |
| Canada                        | 25 (4.6)             |
| Australia                     | 16 (2.9)             |
| France                        | 15 (2.8)             |
| Spain                         | 13 (2.4)             |
| Singapore                     | 11 (2)               |
| Switzerland                   | 7 (1.3)              |
| Germany                       | 6 (1.1)              |
| Ireland                       | 5 (0.9)              |
| Japan                         | 5 (0.9)              |
| Greece                        | 4 (0.7)              |
| Denmark                       | 4 (0.7)              |
| South Korea                   | 4 (0.7)              |
| Netherlands                   | 3 (0.6)              |
| Austria                       | 2 (0.4)              |
| New Zealand                   | 2 (0.4)              |
| Norway                        | 2 (0.4)              |
| Poland                        | 2 (0.4)              |

|              |                   |
|--------------|-------------------|
| Sweden       | 2 (0.4)           |
| UAE          | 1 (0.2)           |
| Belgium      | 1 (0.2)           |
| Chile        | 1 (0.2)           |
| Croatia      | 1 (0.2)           |
| Hungary      | 1 (0.2)           |
| Luxembourg   | 1 (0.2)           |
| Portugal     | 1 (0.2)           |
| Saudi Arabia | 1 (0.2)           |
| Taiwan       | 1 (0.2)           |
| <b>Total</b> | <b>470 (86.6)</b> |

**Table S3**  
**World Health Organization Classification**

|                       |                      |
|-----------------------|----------------------|
| Africa                | Number (Frequency %) |
| N/A                   | N/A                  |
| <b>Total</b>          | <b>0 (0)</b>         |
| South East Asia       | Number (Frequency %) |
| India                 | 19 (3.5)             |
| Bangladesh            | 1 (0.2)              |
| N/A                   | N/A                  |
| <b>Total</b>          | <b>20</b>            |
| Eastern Mediterranean | Number (Frequency %) |
| Iran                  | 6 (1)                |
| Pakistan              | 4 (0.7)              |
| Lebanon               | 1 (0.2)              |
| Jordan                | 1 (0.2)              |
| Afghanistan           | 1 (0.2)              |
| <b>Total</b>          | <b>13 (2.3)</b>      |
| Americas              | Number (Frequency %) |
| USA                   | 178 (33)             |
| Canada                | 18 (3.2)             |
| Brazil                | 9 (1.7)              |
| Chile                 | 1 (0.2)              |
| Peru                  | 1 (0.2)              |
| Mexico                | 1 (0.2)              |
| Argentina             | 1 (0.2)              |
| <b>Total</b>          | <b>210 (38.7)</b>    |
| Europe                | Number (Frequency %) |
| UK                    | 33 (6)               |
| Italy                 | 31 (5.7)             |
| France                | 12 (2.1)             |
| Spain                 | 9 (1.7)              |
| Germany               | 6 (1.1)              |
| Switzerland           | 4 (0.7)              |
| Greece                | 2 (0.4)              |
| Denmark               | 2 (0.4)              |
| Norway                | 2 (0.4)              |
| Austria               | 1 (0.2)              |
| Croatia               | 1 (0.2)              |
| Hungary               | 1 (0.2)              |

|              |            |
|--------------|------------|
| Luxembourg   | 1 (0.2)    |
| Netherlands  | 1 (0.2)    |
| Portugal     | 1 (0.2)    |
| Sweden       | 1 (0.2)    |
| Turkey       | 1 (0.2)    |
| <b>Total</b> | <b>108</b> |

|                        |                             |
|------------------------|-----------------------------|
| <b>Western Pacific</b> | <b>Number (Frequency %)</b> |
| Australia              | 11 (1.9)                    |
| China                  | 11 (1.9)                    |
| Singapore              | 5 (0.9)                     |
| Japan                  | 4 (0.7)                     |
| South Korea            | 3 (0.6)                     |
| New Zealand            | 2 (0.4)                     |
| Taiwan                 | 1 (0.2)                     |
| <b>Total</b>           | <b>37 (6.7)</b>             |

|                              |                             |
|------------------------------|-----------------------------|
| <b>Global / Multicountry</b> | <b>Number (Frequency %)</b> |
|                              | 155 (28.6)                  |
| <b>Total</b>                 | <b>155 (28.6)</b>           |

**Table S4**  
**World Bank Classification**

|                                      |                             |
|--------------------------------------|-----------------------------|
| <b>Low income countries</b>          | <b>Number (Frequency %)</b> |
| Afghanistan                          | 1 (0.2)                     |
| N/A                                  | N/A                         |
| <b>Total</b>                         | <b>1 (0.2)</b>              |
| <b>Lower-middle income countries</b> | <b>Number (Frequency %)</b> |
| India                                | 19 (3.5)                    |
| Pakistan                             | 4 (0.7)                     |
| Bangladesh                           | 1 (0.2)                     |
| <b>Total</b>                         | <b>24 (4.4)</b>             |
| <b>Upper-middle income countries</b> | <b>Number (Frequency %)</b> |
| China                                | 11 (2)                      |
| Brazil                               | 9 (1.7)                     |
| Iran                                 | 6 (1)                       |
| Argentina                            | 1 (0.2)                     |
| Jordan                               | 1 (0.2)                     |
| Lebanon                              | 1 (0.2)                     |
| Mexico                               | 1 (0.2)                     |
| Peru                                 | 1 (0.2)                     |
| Turkey                               | 1 (0.2)                     |
| <b>Total</b>                         | <b>32 (5.9)</b>             |
| <b>High income countries</b>         | <b>Number (Frequency %)</b> |
| USA                                  | 178 (32.8)                  |
| UK                                   | 33 (6)                      |
| Italy                                | 31 (5.7)                    |
| Canada                               | 18 (3.2)                    |
| France                               | 12 (2.1)                    |
| Australia                            | 11 (2)                      |
| Spain                                | 9 (1.7)                     |
| Germany                              | 6 (1.1)                     |
| Singapore                            | 5 (0.7)                     |
| Switzerland                          | 4 (0.7)                     |
| Japan                                | 4 (0.7)                     |
| South Korea                          | 3 (0.6)                     |
| Greece                               | 2 (0.4)                     |
| Denmark                              | 2 (0.4)                     |
| New Zealand                          | 2 (0.4)                     |

|              |                   |
|--------------|-------------------|
| Norway       | 2 (0.4)           |
| Austria      | 1 (0.2)           |
| Chile        | 1 (0.2)           |
| Croatia      | 1 (0.2)           |
| Hungary      | 1 (0.2)           |
| Luxembourg   | 1 (0.2)           |
| Netherlands  | 1 (0.2)           |
| Portugal     | 1 (0.2)           |
| Sweden       | 1 (0.2)           |
| Taiwan       | 1 (0.2)           |
| <b>Total</b> | <b>331 (60.9)</b> |
